## Correction

**Correction: An injectable nucleus pulposus cell-modified decellularized scaffold: biocompatible material for prevention of disc degeneration****Zhi Shan<sup>1,\*</sup>, Xianfeng Lin<sup>1,\*</sup>, Shengyu Wang<sup>1,\*</sup>, Xuyang Zhang<sup>1,\*</sup>, Yichuan Pang<sup>2</sup>, Shengyun Li<sup>1</sup>, Tianming Yu<sup>1</sup>, Shunwu Fan<sup>1</sup> and Fengdong Zhao<sup>1</sup>**<sup>1</sup>Department of Orthopaedic Surgery, Sir Run Run Shaw Hospital, Medical College of Zhejiang University, Hangzhou 310016, China<sup>2</sup>MOE Key Laboratory of Macromolecular Synthesis and Functionalization, Department of Polymer Science and Engineering, Zhejiang University, Hangzhou 310027, China

\*These authors are contributed equally to this work

**Published:** May 31, 2022**Copyright:** © 2022 Shan et al. This is an open access article distributed under the terms of the [Creative Commons Attribution License](#) (CC BY 3.0), which permits unrestricted use, distribution, and reproduction in any medium, provided the original author and source are credited.**This article has been corrected:** In Figure 5, the image in panel B4 is an accidental duplicate of the B2 panel image in Figure 2. Also in Figure 5, panel D4 is an accidental duplicate of panel D3. Panel E4 also contains accidental overlaps with panel D4. The corrected Figure 5, produced using the original data, is shown below. The authors declare that these corrections do not change the results or conclusions of this paper.Original article: Oncotarget. 2017; 8:40276–40288. <https://doi.org/10.18632/oncotarget.16831>

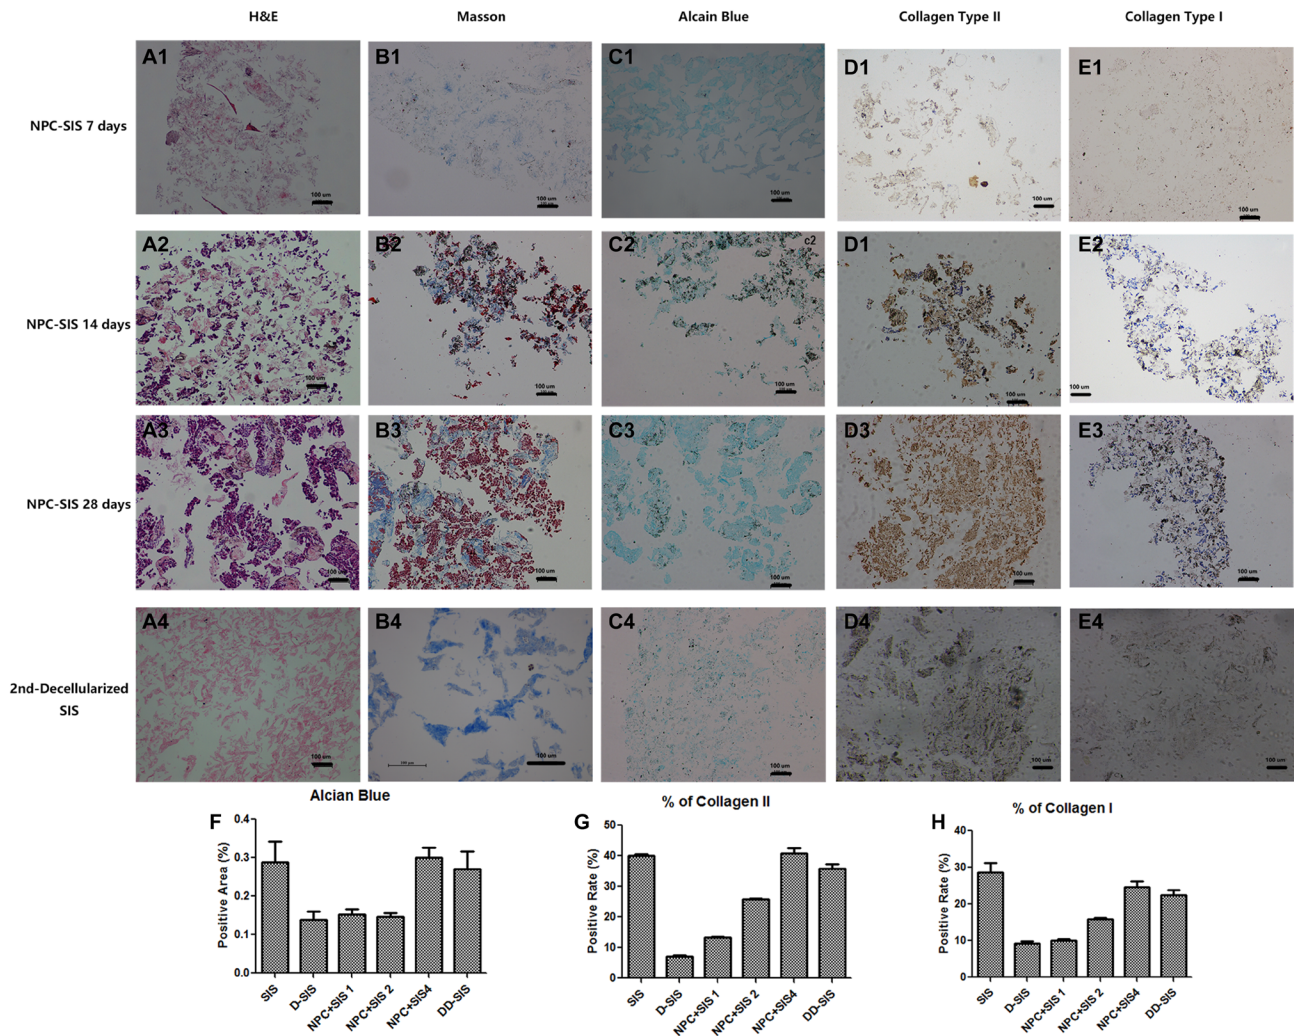

Source: https://www.oncotarget.com/article/28239/pdf/
